# Supplementary material
Source: MDPI journal article supplement (https://www.mdpi.com/2077-1312/10/10/1496)
Supplement: s1 [file s1]

## Supplementary Materials

**Supplementary Table S1** List of taxa found in the panels of predation exclusion experiment. NIS are in bold type. C: control panels; Ca: caged panels; OCa: open-caged panels.

|           |                                                                 | C | Ca | OCa |
|-----------|-----------------------------------------------------------------|---|----|-----|
| Porifera  | <i>Paraleucilla magna</i> Klautau, Monteiro & Borojevic, 2004   |   |    |     |
|           | Porifera ind.                                                   |   |    |     |
| Cnidaria  | <i>Actinia</i> sp.                                              |   |    |     |
|           | <i>Clytia</i> sp.                                               |   |    |     |
|           | <i>Ectopleura</i> sp.                                           |   |    |     |
|           | <i>Eudendrium</i> sp.                                           |   |    |     |
|           | <i>Pennaria disticha</i> Goldfuss, 1820                         |   |    |     |
|           |                                                                 |   |    |     |
| Annelida  | <i>Branchiomma</i> sp. (see Tamburini et al. 2021)              |   |    |     |
|           | <i>Branchiomma luctuosum</i> (Grube, 1870)                      |   |    |     |
|           | <i>Hydroides dianthus</i> (Verrill, 1873)                       |   |    |     |
|           | <i>Hydroides dirampha</i> Mörch, 1863                           |   |    |     |
|           | <i>Hydroides elegans</i> (Haswell, 1883)                        |   |    |     |
|           | <i>Janua</i> sp.                                                |   |    |     |
|           | <i>Simplaria</i> sp.                                            |   |    |     |
|           | <i>Sabella</i> sp.                                              |   |    |     |
|           | <i>Salmacina</i> sp.                                            |   |    |     |
|           | <i>Spirobranchus</i> sp.                                        |   |    |     |
|           | <i>Spirobranchus tetracerus</i> (Schmarda, 1861)                |   |    |     |
|           |                                                                 |   |    |     |
|           |                                                                 |   |    |     |
|           |                                                                 |   |    |     |
|           |                                                                 |   |    |     |
| Mollusca  | <i>Anomia ephippium</i> Linnaeus, 1758                          |   |    |     |
|           | <i>Ostrea edulis</i> Linnaeus, 1758                             |   |    |     |
| Crustacea | <i>Amphibalanus amphitrite amphitrite</i> (Darwin, 1854)        |   |    |     |
|           | <i>Amphibalanus eburneus</i> (Gould, 1841)                      |   |    |     |
|           | <i>Perforatus perforatus</i> (Bruguière, 1789)                  |   |    |     |
|           | <i>Aetea</i> sp.                                                |   |    |     |
| Bryozoa   | <i>Amathia verticillata</i> (Delle Chiaje, 1822)                |   |    |     |
|           | <i>Bugula neritina</i> (Linnaeus, 1758)                         |   |    |     |
|           | <i>Bugulina fulva</i> (Ryland, 1960)                            |   |    |     |
|           | <i>Bugulina stolonifera</i> (Ryland, 1960)                      |   |    |     |
|           | <i>Celleporaria brunnea</i> (Hincks, 1884)                      |   |    |     |
|           | <i>Conopeum seurati</i> (Canu, 1928)                            |   |    |     |
|           | <i>Cradoscrupocellaria bertholletii</i> (Audouin, 1826)         |   |    |     |
|           | <i>Cradoscrupocellaria reptans</i> (Linnaeus, 1758)             |   |    |     |
|           | <i>Crisia denticulata</i> (Lamarck, 1816)                       |   |    |     |
|           | <i>Crisia eburnea</i> (Linnaeus, 1758)                          |   |    |     |
|           | <i>Schizoporella errata</i> (Waters, 1878)                      |   |    |     |
|           | <i>Tricellaria inopinata</i> d'Hondt & Occhipinti Ambrogi, 1985 |   |    |     |
|           | <i>Watersipora subtorquata</i> (d'Orbigny, 1852)                |   |    |     |
|           |                                                                 |   |    |     |
| Tunicata  | <i>Ascidia</i> sp.                                              |   |    |     |

*Botryllus schlosseri* (Pallas, 1766)  
 Didemnidae ind.  
*Diplosoma* sp.  
*Perophora* sp.  
*Phallusia mammillata* (Cuvier, 1815)  
 Stolidobranchia ind.  
*Styela plicata* (Lesueur, 1823)

|  |  |  |
|--|--|--|
|  |  |  |
|  |  |  |
|  |  |  |
|  |  |  |
|  |  |  |
|  |  |  |
|  |  |  |
|  |  |  |

**Supplementary Table S2.** Summary of the ANOVA tests on the response variables. Significant *p* values are in bold.

| Variable                | F value | <i>p</i>    |
|-------------------------|---------|-------------|
| B (g)                   | 0.08    | 0.92        |
| S <sub>NIS</sub>        | 0.51    | 0.61        |
| S <sub>native</sub>     | 0.20    | 0.82        |
| H' (log e)              | 5.54    | <b>0.01</b> |
| C <sub>NIS</sub> (%)    | 0.21    | 0.81        |
| C <sub>native</sub> (%) | 3.90    | <b>0.04</b> |

**Supplementary Table S3** SIMPER table showing taxa contribution to dissimilarity within treatments in the experiment. Data were square-root transformed, and Bray-Curtis index was used to calculate dissimilarity. Av.Abund: average abundance; Av.Diss: average dissimilarity; Sim/SD: ratio between similarity and standard deviation. Contrib%: single taxon contribution; Cum.%: cumulative percentage of contributions. NIS are shown in bold. C: control panels; Ca: caged panels; OCa: open-caged panels.

#### Group C

Average similarity: 71.57

| Species                                                   | Av.Abund | Av.Sim | Sim/SD | Contrib% | Cum.% |
|-----------------------------------------------------------|----------|--------|--------|----------|-------|
| <i>Schizoporella errata</i> (Waters, 1878)                | 0.8      | 17.43  | 11.05  | 24.36    | 24.36 |
| <i>Salmacina</i> sp.                                      | 0.53     | 9.53   | 3.38   | 13.32    | 37.68 |
| <b><i>Hydroides elegans</i> (Haswell, 1883)</b>           | 0.37     | 7.13   | 5.01   | 9.96     | 47.63 |
| <i>Amphibalanus amphitrite amphitrite</i> (Darwin, 1854)  | 0.25     | 4.62   | 3.8    | 6.46     | 54.09 |
| <i>Anomia ephippium</i> Linnaeus, 1758                    | 0.18     | 3.49   | 3.07   | 4.88     | 58.97 |
| <i>Bugulina fulva</i> (Ryland, 1960)                      | 0.19     | 3.45   | 4.57   | 4.82     | 63.79 |
| <b><i>Branchiomma</i> sp. (see Tamburini et al. 2021)</b> | 0.14     | 2.49   | 5.27   | 3.48     | 67.27 |
| <b><i>Styela plicata</i> (Lesueur, 1823)</b>              | 0.13     | 2.49   | 5.27   | 3.48     | 70.76 |
| <i>Crisia eburnea</i> (Linnaeus, 1758)                    | 0.12     | 2.48   | 6.84   | 3.46     | 74.22 |
| <i>Watersipora subtorquata</i> (d'Orbigny, 1852)          | 0.14     | 2.48   | 6.84   | 3.46     | 77.68 |
| <i>Botryllus schlosseri</i> (Pallas, 1766)                | 0.14     | 1.85   | 1.24   | 2.59     | 80.28 |
| <i>Perophora</i> sp.                                      | 0.14     | 1.8    | 1.26   | 2.51     | 82.79 |
| <i>Sabella</i> sp.                                        | 0.11     | 1.72   | 1.31   | 2.4      | 85.18 |
| <i>Clytia</i> sp.                                         | 0.11     | 1.63   | 1.34   | 2.28     | 87.46 |
| <i>Hydroides dianthus</i> (Verrill, 1873)                 | 0.11     | 1.58   | 1.35   | 2.21     | 89.67 |
| <i>Cradoscrupocellaria bertholletii</i> (Audouin, 1826)   | 0.09     | 1.53   | 1.36   | 2.14     | 91.81 |

#### Group Ca

**Average similarity: 63.08**

| <b>Species</b>                                            | <b>Av.Abund</b> | <b>Av.Sim</b> | <b>Sim/SD</b> | <b>Contrib%</b> | <b>Cum.%</b> |
|-----------------------------------------------------------|-----------------|---------------|---------------|-----------------|--------------|
| <i>Schizoporella errata</i> (Waters, 1878)                | 0.43            | 7.48          | 3.46          | 11.87           | 11.87        |
| <i>Anomia ephippium</i> Linnaeus, 1758                    | 0.37            | 5.93          | 1.99          | 9.4             | 21.27        |
| <i>Watersipora subtorquata</i> (d'Orbigny, 1852)          | 0.3             | 4.82          | 2.74          | 7.64            | 28.91        |
| <i>Salmacina</i> sp.                                      | 0.34            | 4.7           | 1.28          | 7.45            | 36.36        |
| <b><i>Branchiomma luctuosum</i> (Grube, 1870)</b>         | 0.25            | 4.27          | 3.31          | 6.78            | 43.14        |
| <b><i>Hydroides elegans</i> (Haswell, 1883)</b>           | 0.25            | 3.58          | 1.93          | 5.68            | 48.82        |
| <i>Sabella</i> sp.                                        | 0.19            | 3.09          | 3.16          | 4.91            | 53.72        |
| <b><i>Branchiomma</i> sp. (see Tamburini et al. 2021)</b> | 0.16            | 2.87          | 4.1           | 4.54            | 58.27        |
| Didemnidae ind.                                           | 0.21            | 2.77          | 3.36          | 4.39            | 62.66        |
| <i>Amphibalanus amphitrite amphitrite</i> (Darwin, 1854)  | 0.15            | 2.62          | 3.85          | 4.15            | 66.81        |
| <i>Crisia eburnea</i> (Linnaeus, 1758)                    | 0.18            | 2.46          | 2.28          | 3.9             | 70.71        |
| <i>Janua</i> sp.                                          | 0.12            | 2.34          | 6.72          | 3.72            | 74.43        |
| <i>Botryllus schlosseri</i> (Pallas, 1766)                | 0.16            | 2.23          | 9.48          | 3.53            | 77.96        |
| <i>Cradoscrupocellaria bertholletii</i> (Audouin, 1826)   | 0.14            | 1.9           | 1.13          | 3.02            | 80.98        |
| <i>Ascidia</i> sp.                                        | 0.2             | 1.74          | 0.65          | 2.76            | 83.73        |
| <i>Clytia</i> sp.                                         | 0.16            | 1.69          | 1.28          | 2.68            | 86.42        |
| <i>Simplaria</i> sp.                                      | 0.1             | 1.55          | 1.34          | 2.46            | 88.88        |
| <i>Perophora</i> sp.                                      | 0.12            | 1.52          | 1.26          | 2.41            | 91.29        |

**Group OCa****Average similarity: 66.75**

| <b>Species</b>                                                           | <b>Av.Abund</b> | <b>Av.Sim</b> | <b>Sim/SD</b> | <b>Contrib%</b> | <b>Cum.%</b> |
|--------------------------------------------------------------------------|-----------------|---------------|---------------|-----------------|--------------|
| <i>Schizoporella errata</i> (Waters, 1878)                               | 0.72            | 13.24         | 1.44          | 19.83           | 19.83        |
| <i>Salmacina</i> sp.                                                     | 0.4             | 6.72          | 2.48          | 10.07           | 29.9         |
| <b><i>Hydroides elegans</i> (Haswell, 1883)</b>                          | 0.27            | 5.13          | 3.35          | 7.68            | 37.58        |
| <i>Watersipora subtorquata</i> (d'Orbigny, 1852)                         | 0.29            | 4.95          | 4.34          | 7.41            | 45           |
| <i>Anomia ephippium</i> Linnaeus, 1758                                   | 0.25            | 3.93          | 3.34          | 5.89            | 50.89        |
| <i>Amphibalanus amphitrite amphitrite</i> (Darwin, 1854)                 | 0.17            | 3             | 4.07          | 4.49            | 55.38        |
| <b><i>Branchiomma</i> sp. (see Tamburini et al. 2021)</b>                | 0.17            | 2.96          | 3.21          | 4.43            | 59.81        |
| <i>Bugulina fulva</i> (Ryland, 1960)                                     | 0.16            | 2.9           | 4.27          | 4.34            | 64.15        |
| <b><i>Styela plicata</i> (Lesueur, 1823)</b>                             | 0.15            | 2.84          | 5.5           | 4.26            | 68.41        |
| <i>Sabella</i> sp.                                                       | 0.13            | 2.62          | 5.67          | 3.92            | 72.33        |
| <i>Bugula neritina</i> (Linnaeus, 1758)                                  | 0.11            | 2.35          | 7.95          | 3.53            | 75.86        |
| <i>Crisia eburnea</i> (Linnaeus, 1758)                                   | 0.12            | 2.06          | 1.46          | 3.09            | 78.95        |
| <i>Cradoscrupocellaria bertholletii</i> (Audouin, 1826)                  | 0.1             | 1.81          | 1.52          | 2.72            | 81.67        |
| <i>Janua</i> sp.                                                         | 0.11            | 1.79          | 1.48          | 2.68            | 84.34        |
| <i>Clytia</i> sp.                                                        | 0.11            | 1.76          | 1.51          | 2.64            | 86.99        |
| <i>Botryllus schlosseri</i> (Pallas, 1766)                               | 0.11            | 1.67          | 1.5           | 2.5             | 89.48        |
| <b><i>Paraleucilla magna</i> Klautau, Monteiro &amp; Borojevic, 2004</b> | 0.07            | 1.15          | 0.92          | 1.72            | 91.2         |

**Supplementary Table S4** SIMPER table showing taxa contribution to dissimilarity between treatments in the experiment of aim 3. Data were square-root transformed, and Bray-Curtis index was used to calculate dissimilarity. Av.Abund: average abundance; Av.Diss: average dissimilarity; Diss/SD: ratio between

dissimilarity and standard deviation. Contrib%: single taxon contribution; Cum.%: cumulative percentage of contributions. NIS are shown in bold. C: control panels; Ca: caged panels; OCa: open-caged panels.

| Groups C & Ca                                                                          |                     |                      |         |         |          |       |
|----------------------------------------------------------------------------------------|---------------------|----------------------|---------|---------|----------|-------|
| Average dissimilarity = 42.28                                                          |                     |                      |         |         |          |       |
| Species                                                                                | Group C<br>Av.Abund | Group Ca<br>Av.Abund | Av.Diss | Diss/SD | Contrib% | Cum.% |
| <i>Schizoporella errata</i><br>(Waters, 1878)                                          | 0.8                 | 0.43                 | 4.1     | 2.52    | 9.7      | 9.7   |
| <i>Salmacina</i> sp.                                                                   | 0.53                | 0.34                 | 2.86    | 1.33    | 6.76     | 16.46 |
| <i>Anomia ephippium</i><br>Linnaeus, 1758                                              | 0.18                | 0.37                 | 2.44    | 1.88    | 5.77     | 22.24 |
| <b><i>Branchiomma luctuosum</i></b><br><b>(Grube, 1870)</b>                            | 0.04                | 0.25                 | 2.37    | 2.01    | 5.61     | 27.84 |
| <i>Ascidia</i> sp.                                                                     | 0.05                | 0.2                  | 1.96    | 1.26    | 4.64     | 32.49 |
| <i>Watersipora subtorquata</i><br>(d'Orbigny, 1852)                                    | 0.14                | 0.3                  | 1.85    | 1.58    | 4.37     | 36.85 |
| <b><i>Hydroides elegans</i></b><br><b>(Haswell, 1883)</b>                              | 0.37                | 0.25                 | 1.74    | 1.37    | 4.1      | 40.96 |
| Didemnidae ind.                                                                        | 0.05                | 0.21                 | 1.73    | 1.08    | 4.09     | 45.05 |
| <i>Bugulina fulva</i> (Ryland,<br>1960)                                                | 0.19                | 0.06                 | 1.68    | 1.6     | 3.97     | 49.02 |
| <i>Crisia denticulata</i><br>(Lamarck, 1816)                                           | 0.11                | 0.11                 | 1.66    | 1.1     | 3.93     | 52.95 |
| <i>Diplosoma</i> sp.                                                                   | 0.1                 | 0.04                 | 1.35    | 0.68    | 3.2      | 56.15 |
| <i>Clytia</i> sp.                                                                      | 0.11                | 0.16                 | 1.22    | 0.97    | 2.88     | 59.02 |
| <i>Amphibalanus amphitrite</i><br><i>amphitrite</i> (Darwin, 1854)                     | 0.25                | 0.15                 | 1.18    | 1.37    | 2.78     | 61.81 |
| <i>Botryllus schlosseri</i> (Pallas,<br>1766)                                          | 0.14                | 0.16                 | 1.14    | 1.03    | 2.69     | 64.5  |
| <i>Simplaria</i> sp.                                                                   | 0                   | 0.1                  | 1.1     | 2.05    | 2.6      | 67.1  |
| <b><i>Styela plicata</i> (Lesueur,<br/>1823)</b>                                       | 0.13                | 0.04                 | 1.07    | 1.64    | 2.53     | 69.63 |
| <i>Hydroides dianthus</i> (Verrill,<br>1873)                                           | 0.11                | 0.02                 | 1.06    | 1.54    | 2.51     | 72.15 |
| <i>Perophora</i> sp.                                                                   | 0.14                | 0.12                 | 1.06    | 1.14    | 2.5      | 74.65 |
| <i>Sabella</i> sp.                                                                     | 0.11                | 0.19                 | 0.98    | 1.2     | 2.33     | 76.97 |
| <i>Cradoscrupocellaria</i><br><i>bertholletii</i> (Audouin,<br>1826)                   | 0.09                | 0.14                 | 0.97    | 1.31    | 2.29     | 79.26 |
| <i>Crisia eburnea</i> (Linnaeus,<br>1758)                                              | 0.12                | 0.18                 | 0.91    | 0.91    | 2.14     | 81.4  |
| <b><i>Paraleucilla magna</i></b><br><b>Klautau, Monteiro &amp;<br/>Borojevic, 2004</b> | 0.03                | 0.09                 | 0.76    | 1.3     | 1.8      | 83.2  |
| <i>Amphibalanus eburneus</i><br>(Gould, 1841)                                          | 0.07                | 0.03                 | 0.7     | 1.14    | 1.65     | 84.85 |



|                                                       |      |      |      |      |      |       |
|-------------------------------------------------------|------|------|------|------|------|-------|
| <i>Branchiomma</i> sp. (see<br>Tamburini et al. 2021) | 0.14 | 0.16 | 0.64 | 1.1  | 1.51 | 86.37 |
| <i>Hydroides dirampha</i><br>Mörch, 1863              | 0.02 | 0.06 | 0.63 | 0.99 | 1.49 | 87.86 |
| <i>Bugula neritina</i> (Linnaeus,<br>1758)            | 0.07 | 0.1  | 0.61 | 0.93 | 1.44 | 89.29 |
| <i>Eudendrium</i> sp.                                 | 0.05 | 0    | 0.57 | 0.98 | 1.34 | 90.64 |

**Groups C & OCa**  
Average dissimilarity =  
30.79

| Species                                                             | Group               |                 | Av.Diss | Diss/SD | Contrib% | Cum.% |
|---------------------------------------------------------------------|---------------------|-----------------|---------|---------|----------|-------|
|                                                                     | Group C<br>Av.Abund | OCa<br>Av.Abund |         |         |          |       |
| <i>Salmacina</i> sp.                                                | 0.53                | 0.4             | 2.59    | 1.34    | 8.43     | 8.43  |
| <i>Schizoporella errata</i><br>(Waters, 1878)                       | 0.8                 | 0.72            | 2.36    | 0.79    | 7.65     | 16.08 |
| <i>Watersipora subtorquata</i><br>(d'Orbigny, 1852)                 | 0.14                | 0.29            | 1.76    | 1.44    | 5.71     | 21.79 |
| <i>Crisia denticulata</i><br>(Lamarck, 1816)                        | 0.11                | 0.09            | 1.55    | 1.01    | 5.02     | 26.81 |
| <i>Diplosoma</i> sp.                                                | 0.1                 | 0.05            | 1.52    | 0.72    | 4.93     | 31.74 |
| <i>Hydroides elegans</i><br>(Haswell, 1883)                         | 0.37                | 0.27            | 1.41    | 1.45    | 4.58     | 36.32 |
| <i>Anomia ephippium</i><br>Linnaeus, 1758                           | 0.18                | 0.25            | 1.23    | 0.97    | 4        | 40.33 |
| <i>Branchiomma luctuosum</i><br>(Grube, 1870)                       | 0.04                | 0.11            | 1.22    | 1.2     | 3.95     | 44.28 |
| <i>Amphibalanus amphitrite</i><br><i>amphitrite</i> (Darwin, 1854)  | 0.25                | 0.17            | 1.19    | 1.28    | 3.85     | 48.13 |
| <i>Perophora</i> sp.                                                | 0.14                | 0.08            | 1.12    | 1.05    | 3.65     | 51.78 |
| <i>Botryllus schlosseri</i> (Pallas,<br>1766)                       | 0.14                | 0.11            | 1.01    | 1.16    | 3.29     | 55.07 |
| <i>Hydroides dianthus</i> (Verrill,<br>1873)                        | 0.11                | 0.04            | 0.9     | 1.23    | 2.94     | 58.01 |
| <i>Bugulina fulva</i> (Ryland,<br>1960)                             | 0.19                | 0.16            | 0.85    | 1.07    | 2.76     | 60.77 |
| <i>Amphibalanus eburneus</i><br>(Gould, 1841)                       | 0.07                | 0.06            | 0.83    | 1.2     | 2.71     | 63.48 |
| Didemnidae ind.                                                     | 0.05                | 0.08            | 0.8     | 1.01    | 2.6      | 66.08 |
| <i>Branchiomma</i> sp. (see<br>Tamburini et al. 2021)               | 0.14                | 0.17            | 0.78    | 1.04    | 2.54     | 68.62 |
| <i>Clytia</i> sp.                                                   | 0.11                | 0.11            | 0.7     | 1.09    | 2.27     | 70.9  |
| <i>Paraleucilla magna</i><br>Klautau, Monteiro &<br>Borojevic, 2004 | 0.03                | 0.07            | 0.67    | 1.13    | 2.19     | 73.09 |
| <i>Sabella</i> sp.                                                  | 0.11                | 0.13            | 0.61    | 1.06    | 1.98     | 75.07 |
| <i>Ascidia</i> sp.                                                  | 0.05                | 0.06            | 0.58    | 0.98    | 1.89     | 76.96 |

|                                                         |      |      |      |      |      |       |
|---------------------------------------------------------|------|------|------|------|------|-------|
| <i>Eudendrium</i> sp.                                   | 0.05 | 0.06 | 0.58 | 0.98 | 1.89 | 78.85 |
| <i>Stolidobranchia</i> ind.                             | 0.03 | 0.04 | 0.55 | 0.93 | 1.77 | 80.62 |
| <i>Janua</i> sp.                                        | 0.08 | 0.11 | 0.54 | 0.85 | 1.76 | 82.38 |
| <i>Crisia eburnea</i> (Linnaeus, 1758)                  | 0.12 | 0.12 | 0.53 | 0.95 | 1.73 | 84.11 |
| <i>Simplaria</i> sp.                                    | 0    | 0.04 | 0.49 | 0.85 | 1.59 | 85.7  |
| <b><i>Styela plicata</i> (Lesueur, 1823)</b>            | 0.13 | 0.15 | 0.47 | 1.17 | 1.53 | 87.23 |
| <i>Bugula neritina</i> (Linnaeus, 1758)                 | 0.07 | 0.11 | 0.46 | 0.78 | 1.5  | 88.73 |
| <i>Cradoscrupocellaria bertholletii</i> (Audouin, 1826) | 0.09 | 0.1  | 0.46 | 0.88 | 1.48 | 90.21 |

**Groups Ca & OCa**  
**Average dissimilarity =**  
**38.93**

| Species                                                 | Group    |      | Av.Diss | Diss/SD | Contrib% | Cum.% |
|---------------------------------------------------------|----------|------|---------|---------|----------|-------|
|                                                         | Group Ca | OCa  |         |         |          |       |
| <i>Schizoporella errata</i> (Waters, 1878)              | 0.43     | 0.72 | 4.72    | 2.44    | 12.13    | 12.13 |
| <i>Anomia ephippium</i> Linnaeus, 1758                  | 0.37     | 0.25 | 2.3     | 1.55    | 5.92     | 18.04 |
| <i>Salmacina</i> sp.                                    | 0.34     | 0.4  | 2.21    | 1.29    | 5.69     | 23.73 |
| <i>Ascidia</i> sp.                                      | 0.2      | 0.06 | 1.97    | 1.27    | 5.05     | 28.78 |
| <b><i>Branchiomma luctuosum</i> (Grube, 1870)</b>       | 0.25     | 0.11 | 1.86    | 1.36    | 4.79     | 33.57 |
| <i>Didemnidae</i> ind.                                  | 0.21     | 0.08 | 1.7     | 1.09    | 4.36     | 37.93 |
| <i>Watersipora subtorquata</i> (d'Orbigny, 1852)        | 0.3      | 0.29 | 1.45    | 1.41    | 3.74     | 41.66 |
| <i>Crisia denticulata</i> (Lamarck, 1816)               | 0.11     | 0.09 | 1.43    | 1.08    | 3.68     | 45.34 |
| <b><i>Hydroides elegans</i> (Haswell, 1883)</b>         | 0.25     | 0.27 | 1.4     | 1.54    | 3.6      | 48.95 |
| <i>Bugulina fulva</i> (Ryland, 1960)                    | 0.06     | 0.16 | 1.39    | 1.78    | 3.58     | 52.53 |
| <i>Clytia</i> sp.                                       | 0.16     | 0.11 | 1.22    | 0.95    | 3.13     | 55.65 |
| <b><i>Styela plicata</i> (Lesueur, 1823)</b>            | 0.04     | 0.15 | 1.21    | 1.81    | 3.1      | 58.75 |
| <i>Crisia eburnea</i> (Linnaeus, 1758)                  | 0.18     | 0.12 | 1.17    | 1.21    | 3        | 61.75 |
| <i>Botryllus schlosseri</i> (Pallas, 1766)              | 0.16     | 0.11 | 0.96    | 0.77    | 2.47     | 64.22 |
| <i>Cradoscrupocellaria bertholletii</i> (Audouin, 1826) | 0.14     | 0.1  | 0.95    | 1.4     | 2.43     | 66.65 |
| <i>Perophora</i> sp.                                    | 0.12     | 0.08 | 0.81    | 1.1     | 2.09     | 68.74 |

|                                                                                    |      |      |      |      |      |       |
|------------------------------------------------------------------------------------|------|------|------|------|------|-------|
| <i>Diplosoma</i> sp.                                                               | 0.04 | 0.05 | 0.81 | 0.82 | 2.07 | 70.8  |
| <i>Sabella</i> sp.                                                                 | 0.19 | 0.13 | 0.79 | 1.18 | 2.03 | 72.83 |
| <i>Simplaria</i> sp.                                                               | 0.1  | 0.04 | 0.78 | 1.23 | 2.01 | 74.84 |
| <b><i>Branchiommma</i> sp. (see<br/>Tamburini et al. 2021)</b>                     | 0.16 | 0.17 | 0.75 | 1.16 | 1.93 | 76.78 |
| <i>Amphibalanus amphitrite</i><br><i>amphitrite</i> (Darwin, 1854)                 | 0.15 | 0.17 | 0.74 | 1.24 | 1.9  | 78.68 |
| <i>Amphibalanus eburneus</i><br>(Gould, 1841)                                      | 0.03 | 0.06 | 0.69 | 0.92 | 1.78 | 80.46 |
| <b><i>Hydroides dirampha</i><br/>Mörch, 1863</b>                                   | 0.06 | 0.01 | 0.64 | 0.97 | 1.64 | 82.1  |
| <i>Eudendrium</i> sp.                                                              | 0    | 0.06 | 0.62 | 1.13 | 1.58 | 83.68 |
| <b><i>Tricellaria inopinata</i><br/>d'Hondt &amp; Occhipinti<br/>Ambrogi, 1985</b> | 0.05 | 0.01 | 0.55 | 0.98 | 1.4  | 85.08 |
| <i>Stolidobranchia</i> ind.                                                        | 0.03 | 0.04 | 0.53 | 0.93 | 1.36 | 86.44 |
| <i>Hydroides dianthus</i> (Verrill,<br>1873)                                       | 0.02 | 0.04 | 0.5  | 0.89 | 1.29 | 87.73 |
| <b><i>Paraleucilla magna</i><br/>Klautau, Monteiro &amp;<br/>Borojevic, 2004</b>   | 0.09 | 0.07 | 0.47 | 0.84 | 1.22 | 88.95 |
| <i>Janua</i> sp.                                                                   | 0.12 | 0.11 | 0.47 | 1.03 | 1.21 | 90.17 |

---

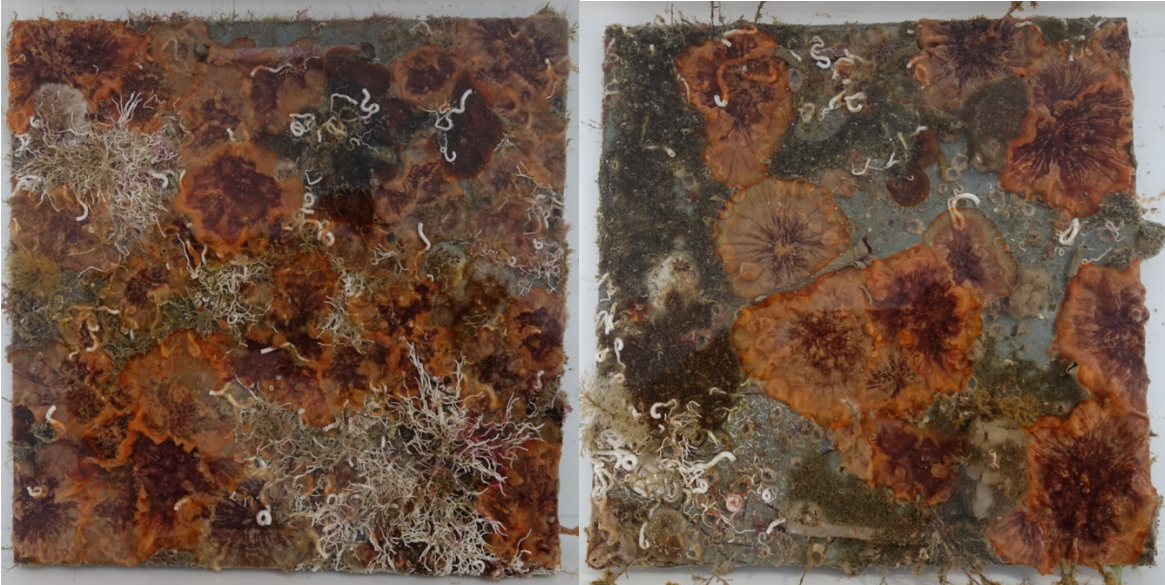

**Supplementary Figure S1** Pictures of two PVC panels pertaining to the treatment level “control panels”.

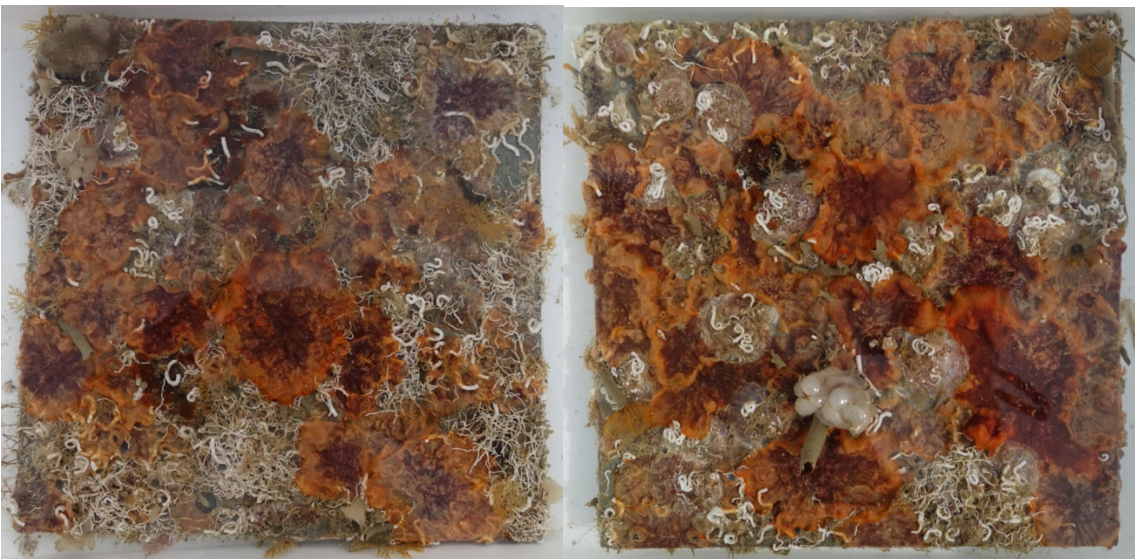

**Supplementary Figure S2** Pictures of two PVC panels pertaining to the treatment level “open-caged panels”.

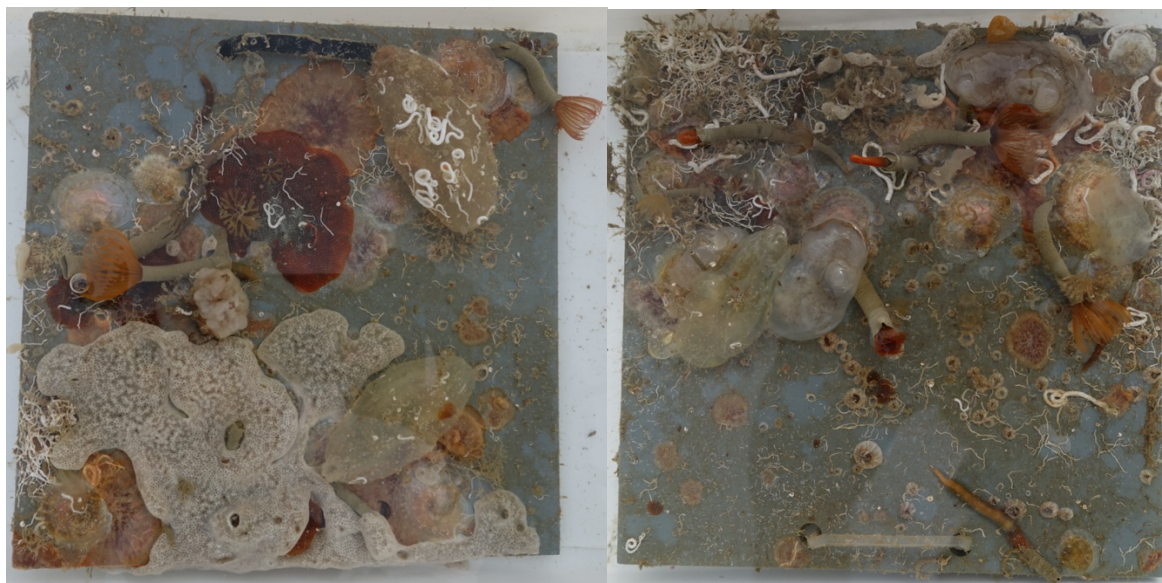

**Supplementary Figure S3** Pictures of two PVC panels pertaining to the treatment level “caged panels”.
